# Supplementary material for: Simotang Alleviates the Gastrointestinal Side Effects of Chemotherapy by Altering Gut Microbiota
Source: PubMed Central journal article supplement (PMC9628794; doi:10.4014/jmb.2110.10018), 2022-02-28
Supplement: jmb-32-4-405-supple.pdf [file jmb-32-4-405-supple.pdf]

Supplemental Table 1. SMT reversed the DDP-induced changes at the 'phylum' level of gut microbiota

| Name                                  | DDP<br>Group | SMT<br>Groups | Effect                                                                                         |
|---------------------------------------|--------------|---------------|------------------------------------------------------------------------------------------------|
| The Ratio of Firmicutes/Bacteroidetes | DOWN         | UP            | Patients with a low ratio of Firmicutes/Bacteroides may have intestinal inflammatory diseases. |
| Firmicutes                            | DOWN         | UP            | Low abundance of Firmicutes is related to inflammation.                                        |
| Bacteroidetes                         | UP           | DOWN          | Abundance of Bacteroides is enhanced in ulcerative colitis.                                    |
| Proteobacteria                        | UP           | UP            | Increased abundance of Proteobacteria is related with ulcerative colitis.                      |
| Candidatus Melainabacteria            | UP           | DOWN          | SMT can reduce the abundance of Candidatus Melainabacteria.                                    |

Supplemental Table 2. SMT reversed the DDP-induced changes at the 'genus' level of gut microbiota

| NAME            | BELONGING<br>(PHYLUM) | DDP<br>GROU<br>P | SMT<br>GROUPS | EFFECT                                                                                                                                             |
|-----------------|-----------------------|------------------|---------------|----------------------------------------------------------------------------------------------------------------------------------------------------|
| Lactobacillus   | Firmicutes            | DOWN             | UP            | Lactobacillus (probiotic) has anti-inflammatory and anti-cancer effects on colorectal cancer associated with colitis.                              |
| Bifidobacterium | Actinobacteria        | --               | UP            | Bifidobacteria (probiotic) can strengthen the intestinal mucus layer and relieve intestinal inflammation.                                          |
| Alistipes       | Bacteroides           | UP               | DOWN          | Alistipes is one of pathogenic bacteria in colorectal cancer and promotes ileal inflammation.                                                      |
| Oscillibacter   | Firmicutes            | --               | UP            | Abundance of Oscillibacter is increased in ulcerative colitis.                                                                                     |
| Turicibacter    | Firmicutes            | DOWN             | UP            | Abundance of Turicibacter is significantly reduced in inflammation such as inflammatory bowel disease and oral mucosal ulcers.                     |
| Parasutterella  | Proteobacteria        | --               | UP            | Parasutterella causes increased levels of hypoxanthine (helps to protect the homeostasis of the intestinal mucosa) and has anti-infection effects. |
| Enterorhabdus   | Actinobacteria        | --               | DOWN          | The abundance of Enterorhabdus decreased with the alleviation of the inflammatory response induced by the high-fat and high-fructose diet.         |
| Akkermansia     | Verrucomicrobia       | --               | UP            | Anti-cancer star bacteria, and its abundance is reduced in patients with                                                                           |

cancer.

|                        |                |      |      |                                                                                                                                                                                                                                   |
|------------------------|----------------|------|------|-----------------------------------------------------------------------------------------------------------------------------------------------------------------------------------------------------------------------------------|
| Olsenella              | Actinobacteria | UP   | UP   | Olsenella can enhance the anti-tumor ability of T cells in a variety of tumor.                                                                                                                                                    |
| Faecalibaculum         | Firmicutes     | --   | UP   | Faecalibaculum exert anti-tumor effects by producing short-chain fatty acids.                                                                                                                                                     |
| Kineothrix             | Firmicutes     | --   | UP   | Kineothrix can produce butyric acid. Butyric acid enhances the immune barrier of the intestinal mucosa and has anti-inflammatory and anti-cancer effects.                                                                         |
| Pseudoflavonifractor   | Firmicutes     | UP   | UP   | Pseudoflavonifractor is a probiotic that can produce butyric acid and regulate immune function.                                                                                                                                   |
| Erysipelatoclostridium | Firmicutes     | UP   | DOWN | Erysipelatoclostridium is a conditional pathogen that can invasively infect patients with weakened immune function.                                                                                                               |
| Ileibacterium          | Firmicutes     | DOWN | --   | Ileibacterium is positively correlated with atherosclerosis.                                                                                                                                                                      |
| Culturomica            | Bacteroides    | UP   | DOWN | Culturomica belongs to the family Porphyromonadaceae (increased in arthritis and ileitis). Culturomica and Alitipes belong to the same phylum Bacteroides, and the trend is the same (increased abundance might promote ileitis). |

---
